# Supplementary material
Source: PubMed Central journal article supplement (PMC6414379)
Supplement: AEM.02768-18-s0001.pdf [file AEM.02768-18-s0001.pdf]

**Figure S1.** Chlorinated tetrahydrofolate intermediates (A, B: CHCl<sub>2</sub>-THF; C, D: CH<sub>2</sub>Cl-THF; E: CHCl=THF) potentially involved in DCM metabolism

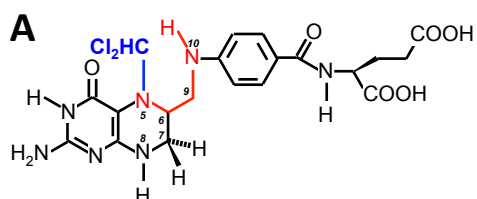

*N*<sub>5</sub>-Dichloro-methyl-5,6,7,8-tetrahydrofolic acid

Abbreviation: **CHCl<sub>2</sub>-THF**

Formula: C<sub>20</sub>H<sub>23</sub>N<sub>7</sub>O<sub>6</sub>Cl<sub>2</sub>

MW: 528.3

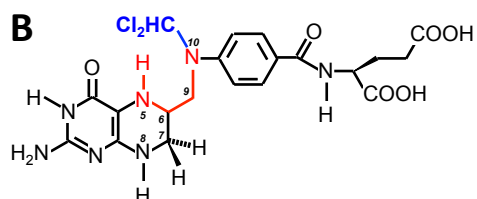

*N*<sub>10</sub>-Dichloro-methyl-5,6,7,8-tetrahydrofolic acid

Abbreviation: **CHCl<sub>2</sub>-THF**

Formula: C<sub>20</sub>H<sub>23</sub>N<sub>7</sub>O<sub>6</sub>Cl<sub>2</sub>

MW: 528.3

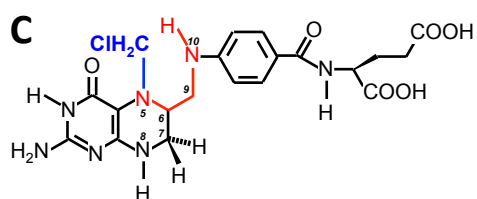

*N*<sub>5</sub>-Chloro-methyl-5,6,7,8-tetrahydrofolic acid

Abbreviation: **CH<sub>2</sub>Cl-THF**

Formula: C<sub>20</sub>H<sub>24</sub>N<sub>7</sub>O<sub>6</sub>Cl

MW: 493.8

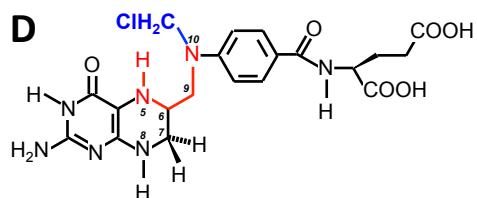

*N*<sub>10</sub>-Chloro-methyl-5,6,7,8-tetrahydrofolic acid

Abbreviation: **CH<sub>2</sub>Cl-THF**

Formula: C<sub>20</sub>H<sub>24</sub>N<sub>7</sub>O<sub>6</sub>Cl

MW: 493.8

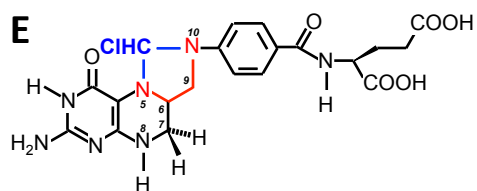

*N*<sub>5</sub>,*N*<sub>10</sub>-Chloro-methyl-5,6,7,8-tetrahydrofolic acid

Abbreviation: **CHCl=THF**

Formula: C<sub>20</sub>H<sub>22</sub>N<sub>7</sub>O<sub>6</sub>Cl

MW: 491.8
